# Supplementary material for: Correlation of Memory T Cell Responses against TRAP with Protection from Clinical Malaria, and CD4+ CD25high T Cells with Susceptibility in Kenyans
Source: PubMed Central journal article supplement (PMC2323567; doi:10.1371/journal.pone.0002027), 2008-04-30
Supplement: pone.0002027.s003.pdf [file pone.0002027.s003.pdf]

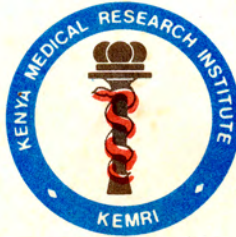

# KENYA MEDICAL RESEARCH INSTITUTE

P.O. Box 54840, Tel: (02) 722541, Fax: (02) 720030, Tlx. 25696 KEMRI, NAIROBI, Kenya.

KEMRI/RES/7/3/1

9th June, 1995

Dr. K. Marsh,  
CRC - Kilifi Unit

Thro'

The Director,  
Clinical Research Centre,  
NAIROBI

*Forwarded  
Nkw 12/6/95*

RE: SSC Protocol No. 359 "The role of Plasmodium falciparum  
variant antigens expressed at the infected cell surface  
in generation of protective immunity and in the  
pathogenesis of clinical malaria" by K. Marsh et al.

-----

During the 64th KEMRI/National Ethical Review Committee meeting held on 6th June 1995 in the KEMRI Headquarters Lecture Room the above protocol was granted full approval since you presented an acceptable Informed Consent Form.

*Georgina*  
G.A.O. SEKO  
FOR: SECRETARY,  
KEMRI/NATIONAL ETHICAL REVIEW COMMITTEE
